# Supplementary material
Source: publisher site journal article supplement (https://www.dovepress.com/article/474722)
Supplement: Supplementary file 1 [file get_supplementary_file.php]

**Table S1. Patient and care partner characteristics**

|  | **Total Patients (N=126)** | **Total Care Partners**  **(N=30)** |
| --- | --- | --- |
| **Education, n (%)** |  |  |
| Some high school or less | 3 (2) | 0 (0) |
| High school graduate or GED | 10 (8) | 1 (3) |
| Some college, but less than a Bachelor’s degree | 25 (20) | 2 (7) |
| College Bachelor’s degree | 43 (34) | 12 (40) |
| Postgraduate degree (Master’s, Doctorate, etc.) | 43 (34) | 15 (50) |
| Trade school, professional program | 2 (2) | 0 (0) |
| **Employment Status, n (%)** |  |  |
| Retired | 51 (40) | 2 (7) |
| Full-time | 21 (17) | 22 (73) |
| Unable to work | 35 (28) | 1 (3) |
| Self-employed | 7 (6) | 3 (10) |
| Part-time | 7 (6) | 0 (0) |
| Home-maker | 3 (2) | 1 (3) |
| Student | 1 (1) | 1 (3) |
| Unemployed | 1 (1) | 0 (0) |
| **Household Income, n (%)** |  |  |
| Less than $25,000 | 15 (12) | 0 (0) |
| $25,000-$49,999 | 24 (19) | 1 (3) |
| $50,000-$74,999 | 14 (11) | 5 (17) |
| $75,000-$99,999 | 30 (24) | 5 (17) |
| $100,000-$124,999 | 18 (14) | 10 (33) |
| $125,000-$149,999 | 6 (5) | 3 (10) |
| $150,000 or more | 11 (9) | 4 (13) |
| Prefer not to answer | 8 (6) | 2 (7) |
| **Relationship, n (%)a** |  |  |
| Spouse or Partner | 71 (71)b | 14 (47) |
| Relative (non-spouse/partner) | 9 (9)b | 10 (33) |
| Sibling | 11 (11)b | 2 (7) |
| Adult child | 29 (29)b | 1 (3) |
| Former spouse/partner | 3 (3)b | 0 (0) |
| Friend | 5 (5)b | 0 (0) |
| Other | 3 (3)b | 3 (10) |
| **Duration of caregiving, n (%)** |  |  |
| < 6 months | -- | 1 (3) |
| 6 month – < 1 year | -- | 5 (17) |
| 1-<5 years | -- | 15 (50) |
| 5-<10 years | -- | 6 (20) |
| 10+ years | -- | 3 (10) |
| **Hours per week providing care, n (%)** | -- |  |
| < 6 hours | -- | 10 (33) |
| 6-<20 hours | -- | 16 (53) |
| 20-<40 hours | -- | 4 (13) |
| 40+ | -- | 0 (0) |

*a More than one role could be selected; b Only 100 patients out of the 126 reported that they consider someone to be a care partner*
